# Supplementary material for: Chemical Composition, Functional and Antioxidant Properties of Dietary Fibre Extracted from Lemon Peel after Enzymatic Treatment
Source: MDPI journal article supplement (doi:10.3390/molecules29010269), 2024-01-04
Supplement: s1 [file s1]

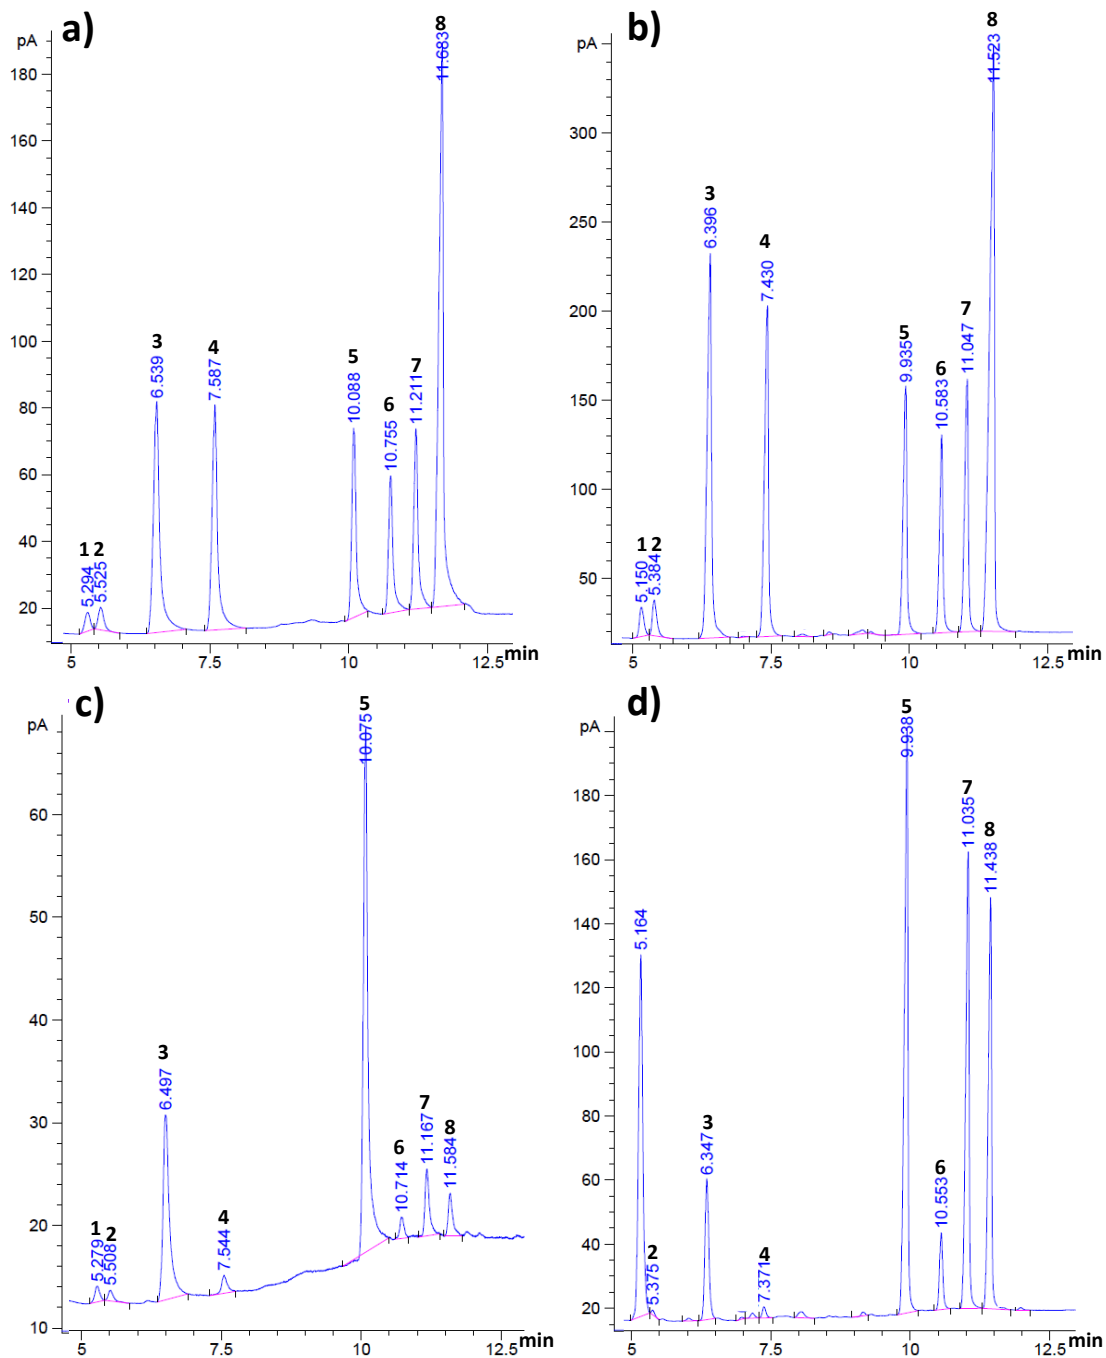

**Figure S1.** Chromatograms of a) standard mix I for LP sample; b) standard mix II for LPp sample; c) LP sample; d) LPp sample. Different peaks are 1 (rhamnose); 2 (fucose); 3 (arabinose); 4 (xylose); 5 (allose); 6 (mannose); 7 (galactose); 8 (glucose).
